# Supplementary material for: Revisiting actinide–DTPA complexes in aqueous solution by CE-ICPMS and ab initio molecular dynamics
Source: Royal Society of Chemistry journal article supplement (doi:10.1039/c6ra08121e), 2016-01-01
Supplement: c6ra08121e1.pdf [file c6ra08121e1.pdf]

## Supplementary data

**Table A.** Th electrophoretic mobility variation as function of DTPA, conditions of separation  $[H^+] = 0.040$  M,  $I = 0.1$  M  $NaNO_3$ ,  $T = 25-26$  °C,  $V = +10$  kV. DMF is used as electroosmotic flow marker.

| $C_{DTPA}$ (M) +<br>$C_{NTA} = 10^{-6}$ M | $\mu$ ( $\times 10^4$ cm <sup>2</sup> V <sup>-1</sup> s <sup>-1</sup> ) | $C_{DTPA}$ (M) +<br>$C_{NTA} = 0$ | $\mu$ ( $\times 10^4$ cm <sup>2</sup> V <sup>-1</sup> s <sup>-1</sup> ) |
|-------------------------------------------|-------------------------------------------------------------------------|-----------------------------------|-------------------------------------------------------------------------|
| 0                                         | +1.105*                                                                 | 0                                 | +2.561*                                                                 |
| $10^{-8}$                                 | +1.103                                                                  | 0                                 | +2.352                                                                  |
| $10^{-5}$                                 | +0.225                                                                  | $10^{-8}$                         | +2.546                                                                  |
| $5 \times 10^{-5}$                        | -0.416                                                                  | $10^{-7}$                         | +2.444                                                                  |
| $10^{-4}$                                 | -0.662                                                                  | $10^{-6}$                         | -0.808                                                                  |
| $5 \times 10^{-4}$                        | -0.976                                                                  | $10^{-6}$                         | -1.021                                                                  |
| $10^{-3}$                                 | -0.882                                                                  | $5 \times 10^{-4}$                | -0.939                                                                  |
| $5 \times 10^{-3}$                        | -0.975                                                                  | $10^{-4}$                         | -0.834                                                                  |
| $10^{-2}$                                 | -0.965                                                                  | $10^{-3}$                         | -0.936                                                                  |
|                                           |                                                                         | $8 \times 10^{-3}$                | -0.948                                                                  |

\* Remark: at  $C_{DTPA} = 0$  and  $C_{NTA} = 10^{-6}$  M, the main Th species is  $ThNTA^+$  ( $\mu = +1.105 \times 10^4$  cm<sup>2</sup>V<sup>-1</sup>s<sup>-1</sup>) whereas for  $C_{DTPA} = C_{NTA} = 0$ , the main species is  $Th^{4+}$  ( $\mu = +2.561 \times 10^4$  cm<sup>2</sup>V<sup>-1</sup>s<sup>-1</sup>). The limiting  $\mu$  value at high DTPA concentration ( $\approx -0.96 \times 10^4$  cm<sup>2</sup>V<sup>-1</sup>s<sup>-1</sup>) corresponds to the complex  $ThDTPA^-$ .

**Table B.** Pu relative area variation as function of of DTPA, conditions of separation  $[H^+] = 0.040$  M,  $I = 0.1$  M  $NaNO_3$ ,  $T = 25-26$  °C,  $V = +10$  kV.

| pH with<br>$C_{DTPA} = 10^{-4}$ M | Relative area<br>PuDTPA <sup>-</sup> (%) | Relative area<br>Pu(NTA) <sub>2</sub> <sup>2-</sup> (%) |
|-----------------------------------|------------------------------------------|---------------------------------------------------------|
| $10^{-7}$                         | 14.42                                    | 85.58                                                   |
| $5 \times 10^{-7}$                | 17.35                                    | 82.65                                                   |
| $10^{-6}$                         | 26.09                                    | 73.91                                                   |
| $5 \times 10^{-5}$                | 55.22                                    | 44.78                                                   |
| $10^{-5}$                         | 38.23                                    | 61.77                                                   |
| $10^{-4}$                         | 60.02                                    | 39.98                                                   |
| $5 \times 10^{-4}$                | 79.13                                    | 20.87                                                   |

**Table C.** Th electrophoretic mobility variation as function of pH, conditions of separation  $C_{DTPA} = 10^{-4}$  and  $10^{-2}$  M,  $I = 0.1$  M TMAX (X = MES or HEPES),  $T = 25-26$  °C,  $V = +10$  kV. DMF is used as electroosmotic flow marker.

| pH with<br>$C_{DTPA} = 10^{-4}$ M | $\mu$ ( $\times 10^4$ cm <sup>2</sup> V <sup>-1</sup> s <sup>-1</sup> ) | pH with<br>$C_{DTPA} = 10^{-2}$ M | $\mu$ ( $\times 10^4$ cm <sup>2</sup> V <sup>-1</sup> s <sup>-1</sup> ) |
|-----------------------------------|-------------------------------------------------------------------------|-----------------------------------|-------------------------------------------------------------------------|
| 5.978                             | -2.365                                                                  | 6.045                             | -1.559                                                                  |
| 6.455                             | -2.452                                                                  | 6.503                             | -1.581                                                                  |
| 6.995                             | -2.387                                                                  | 7.114                             | -1.514                                                                  |
| 7.565                             | -2.477                                                                  | 7.488                             | -1.514                                                                  |
| 8.451                             | -3.169                                                                  | 8.091                             | -1.568                                                                  |
| 9.377                             | -3.452                                                                  | 8.548                             | -2.1817                                                                 |
|                                   |                                                                         | 9.612                             | -2.6952                                                                 |

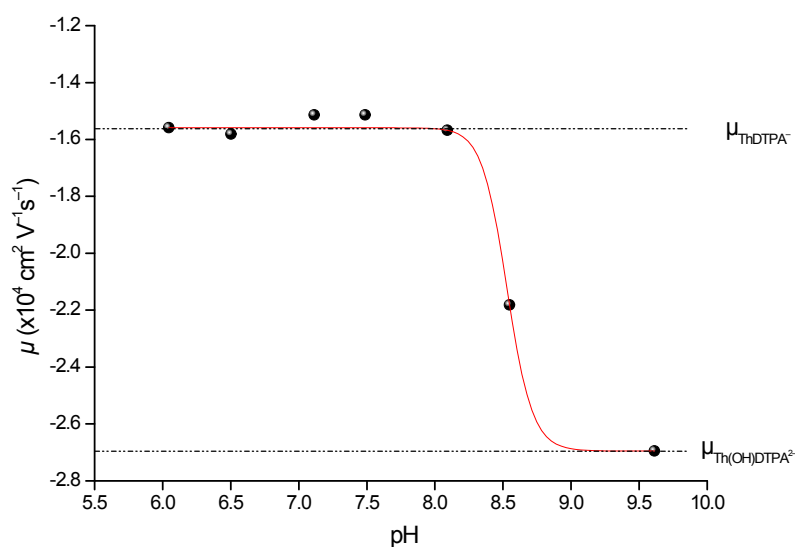

Figure C. example of the variation of the electrophoretic mobility of Th species as function of pH at  $C_{DTPA} = 10^{-2}$  M, 0.1 M TMAX (X = MES or HEPES), T = 25 °C.

Table D. Np electrophoretic mobility variation as function of pH, conditions of separation  $C_{DTPA} = 10^{-4}$  and  $10^{-2}$  M, I = 0.1 M TMA/(MES or HEPES), T = 25-26 °C, V = +10 kV. DMF is used as electroosmotic flow marker.

| pH with $C_{DTPA} = 10^{-4}$ M | $\mu$ ( $\times 10^4$ cm $^2$ V $^{-1}$ s $^{-1}$ ) | pH with $C_{DTPA} = 10^{-2}$ M | $\mu$ ( $\times 10^4$ cm $^2$ V $^{-1}$ s $^{-1}$ ) |
|--------------------------------|-----------------------------------------------------|--------------------------------|-----------------------------------------------------|
| 5.978                          | -2.459                                              | 6.045                          | -1.383                                              |
| 6.455                          | -2.529                                              | 6.503                          | -1.477                                              |
| 6.995                          | -2.477                                              | 7.114                          | -1.577                                              |
| 7.565                          | -2.545                                              | 7.488                          | -1.711                                              |
| 7.995                          | -3.046                                              | 8.091                          | -1.862                                              |
| 8.451                          | -3.221                                              | 8.548                          | -2.051                                              |
| 9.377                          | -3.327                                              | 9.612                          | -2.167                                              |

Table E. Pu relative area variation as function of pH, conditions of separation  $C_{DTPA} = 10^{-4}$  and  $10^{-2}$  M, I = 0.1 M TMA/(MES or HEPES), T = 25-26 °C, V = +10 kV. DMF is used as electroosmotic flow marker.

| pH with $C_{DTPA} = 10^{-4}$ M | Relative area Pu(OH)DTPA $^{2-}$ (%) | Relative area PuDTPA $^{-}$ (%) | pH with $C_{DTPA} = 10^{-2}$ M | Relative area Pu(OH)DTPA $^{2-}$ (%) | Relative area PuDTPA $^{-}$ (%) |
|--------------------------------|--------------------------------------|---------------------------------|--------------------------------|--------------------------------------|---------------------------------|
| 5.047                          | 1.97                                 | 98.03                           | 6.045                          | 14.87                                | 85.13                           |
| 6.070                          | 20.63                                | 79.37                           | 6.503                          | 29.75                                | 70.25                           |
| 7.466                          | 53.57                                | 46.43                           | 7.114                          | 53.05                                | 46.95                           |
| 7.806                          | 56.65                                | 43.35                           | 7.488                          | 63.51                                | 36.49                           |
| 8.021                          | 56.60                                | 43.40                           | 8.091                          | 65.39                                | 34.61                           |
| 8.261                          | 98.88                                | 98.02                           | 8.548                          | 63.63                                | 36.37                           |
| 8.674                          | 75.23                                | 24.77                           | 9.612                          | 77.67                                | 22.33                           |

**Table F. variations of  $\mu_{Th}$  and  $\mu_{Pu}$  as function of the total concentration of nitrilotriacetic acid (NTA) at  $I = 0.1 \text{ M}$  ( $\text{NaNO}_3$ ),  $T = 25 \text{ }^\circ\text{C}$ , and  $[\text{H}^+] = 0.040 \text{ M}$ ,  $V = +10 \text{ kV}$ . DMF is used as electroosmotic flow marker.**

| $C_{NTA} \text{ (M)}$ | $\mu_{Th} (\times 10^4 \text{ cm}^2\text{V}^{-1}\text{s}^{-1})$ | $C_{NTA} \text{ (M)}$ | $\mu_{Pu} (\times 10^4 \text{ cm}^2\text{V}^{-1}\text{s}^{-1})$ |
|-----------------------|-----------------------------------------------------------------|-----------------------|-----------------------------------------------------------------|
| $10^{-10}$            | 2.565                                                           | $10^{-8}$             | 2.742                                                           |
| $10^{-10}$            | 3.074                                                           | $10^{-8}$             | 2.754                                                           |
| $10^{-10}$            | 3.146                                                           | $10^{-7}$             | 2.559                                                           |
| $10^{-8}$             | 2.742                                                           | $10^{-7}$             | 2.999                                                           |
| $10^{-8}$             | 2.832                                                           | $5 \times 10^{-7}$    | 2.618                                                           |
| $10^{-8}$             | 2.964                                                           | $10^{-6}$             | 0.922                                                           |
| $10^{-7}$             | 2.756                                                           | $10^{-6}$             | 0.331                                                           |
| $10^{-7}$             | 3.094                                                           | $5 \times 10^{-6}$    | -0.373                                                          |
| $5 \times 10^{-7}$    | 2.442                                                           | $10^{-5}$             | -0.426                                                          |
| $10^{-6}$             | 2.655                                                           | $5 \times 10^{-5}$    | -1.726                                                          |
| $10^{-6}$             | 2.906                                                           | $10^{-4}$             | -1.991                                                          |
| $10^{-6}$             | 2.404                                                           | $10^{-4}$             | -2.345                                                          |
| $5 \times 10^{-6}$    | 2.765                                                           | $10^{-3}$             | -2.153                                                          |
| $10^{-5}$             | 2.615                                                           | $10^{-3}$             | -2.418                                                          |
| $10^{-5}$             | 2.391                                                           | $5 \times 10^{-3}$    | -2.417                                                          |
| $5 \times 10^{-5}$    | 1.943                                                           | $8 \times 10^{-3}$    | -2.125                                                          |
| $10^{-4}$             | 1.712                                                           |                       |                                                                 |
| $10^{-4}$             | 1.732                                                           |                       |                                                                 |
| $10^{-4}$             | 1.449                                                           |                       |                                                                 |
| $2 \times 10^{-4}$    | 1.105                                                           |                       |                                                                 |
| $5 \times 10^{-4}$    | -0.477                                                          |                       |                                                                 |
| $10^{-3}$             | -0.898                                                          |                       |                                                                 |
| $10^{-3}$             | 0.048                                                           |                       |                                                                 |
| $10^{-3}$             | -1.360                                                          |                       |                                                                 |
| $5 \times 10^{-3}$    | -2.410                                                          |                       |                                                                 |
| $8 \times 10^{-3}$    | -2.371                                                          |                       |                                                                 |
